# Supplementary material for: The tuning of metal enhanced fluorescence for sensing applications
Source: Royal Society of Chemistry journal article supplement (doi:10.1039/c3dt52258j), 2013-10-02
Supplement: c3dt52258j.pdf [file c3dt52258j.pdf]

**Electronic Supplementary Information**

**Tuning of Metal Enhanced Fluorescence for Sensing Applications**

**Mainak Ganguly, Chanchal Mondal, Joydeep Chowdhury, Jaya Pal, Anjali Pal, and Tarasankar Pal\***

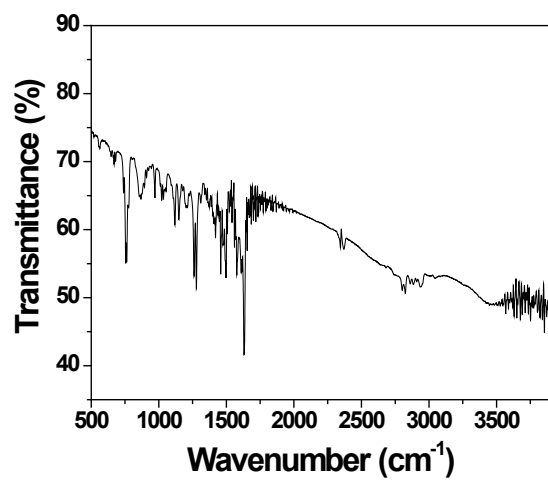

Figure S1: IR spectrum of CP ( $\text{cm}^{-1}$ , KBr disk).  
1645 (vs,  $\nu\text{C}=\text{N}$ ), 1613, 1583, 1494, 1485, 1465, 1420 (vs or s,  $\nu\text{C}=\text{C}$ ).

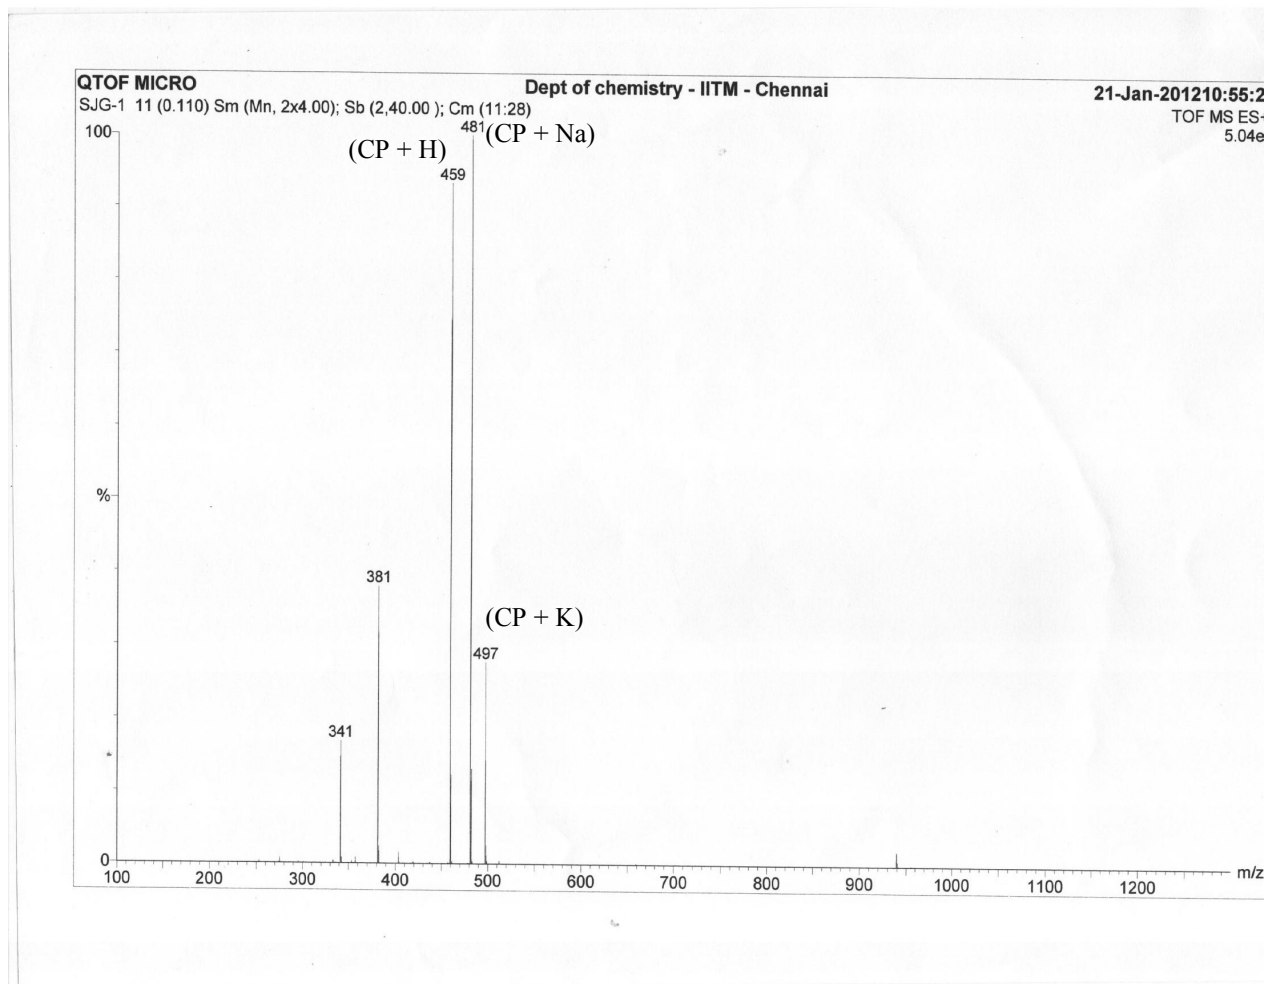

Figure 2: Mass spectra of CP.

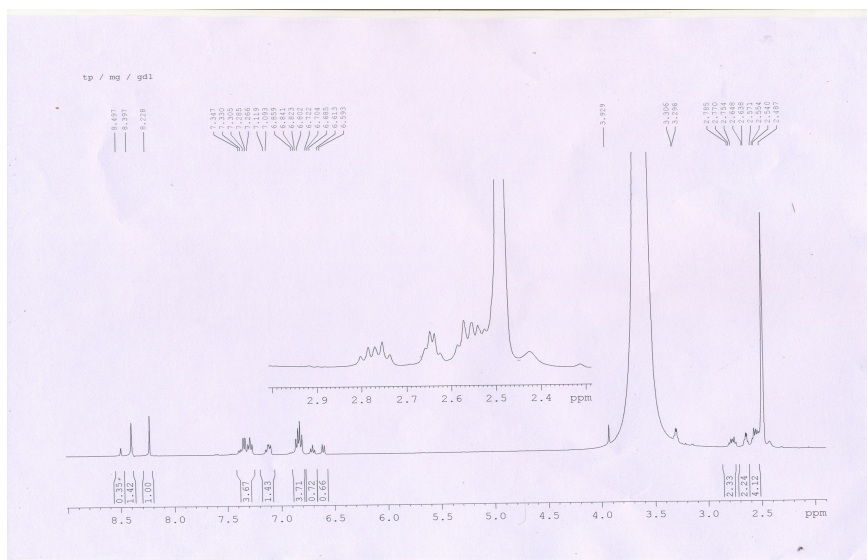

Figure S3:  $^1\text{H-NMR}$  spectrum of CP in  $d^6\text{-DMSO}$ .  $\delta_{\text{ppm}}$ : 8.39 (3H, s, OH), 8.23 (2H, s, N=C-H), 6.6-7.4 (12H, m, Ar-H), 2.4-2.8 (12H, m,  $\text{CH}_2$ ).

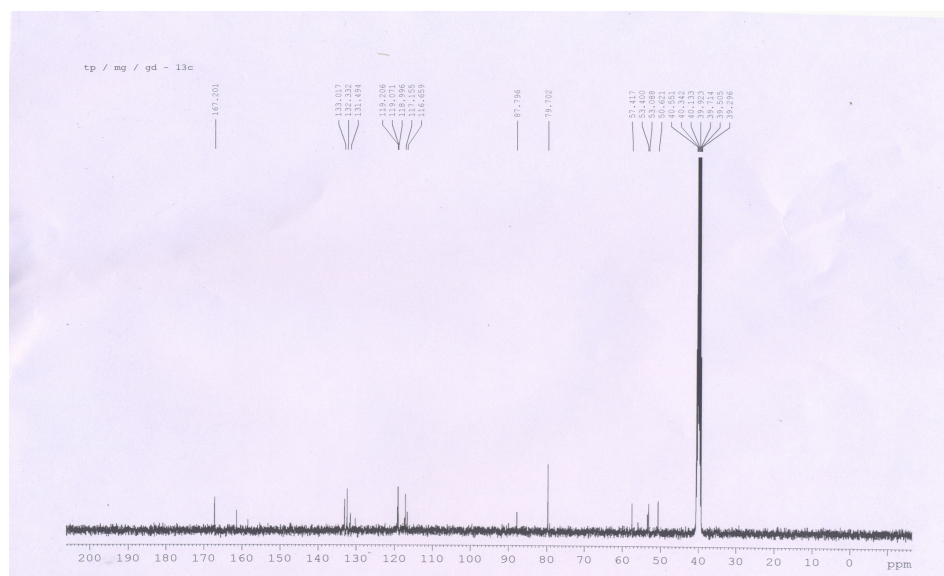

Figure S4:  $^{13}\text{C}$ -NMR of CP in DMSO.  $\delta_{\text{ppm}}$ : 50.6-57.4 (N-CH<sub>2</sub>-CH<sub>2</sub>-N), 79.7 (Ar-CN<sub>2</sub>), 167.2 (-HC=N), 119 and 133 (C in aromatic ring).

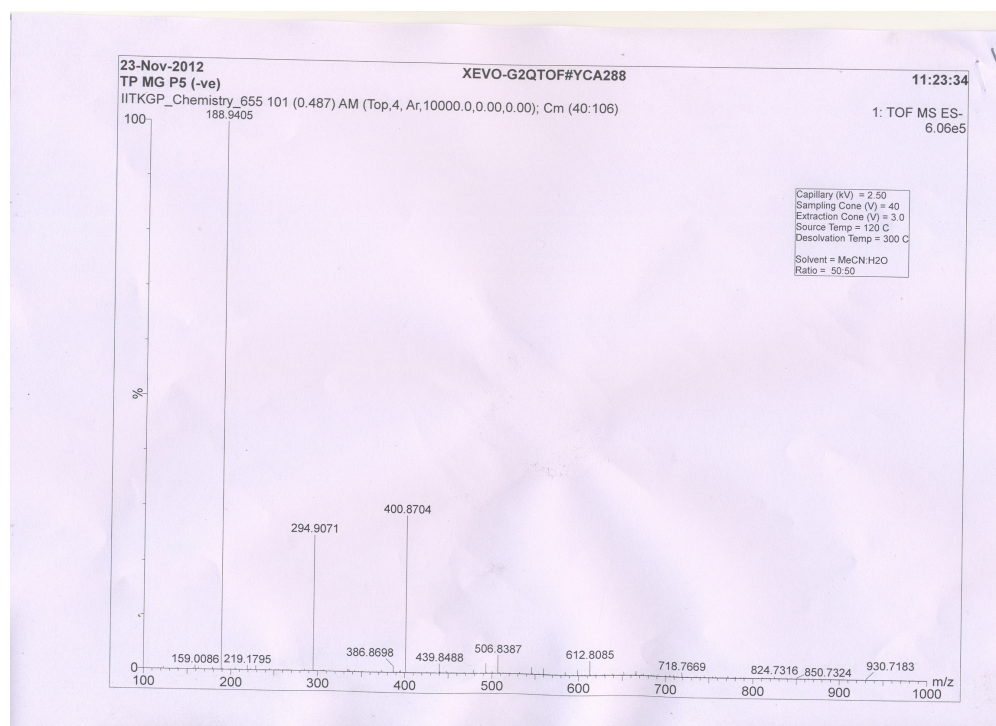

Figure S5: ESI-mass spectrum of CP capped AgNPs. Peak : 506 (OCP + 2Na + 2H), 612 (OCP + 2Na + Ag), 718 (OCP + 2Na + 2Ag), 824 (OCP + 2Na + 2Ag).

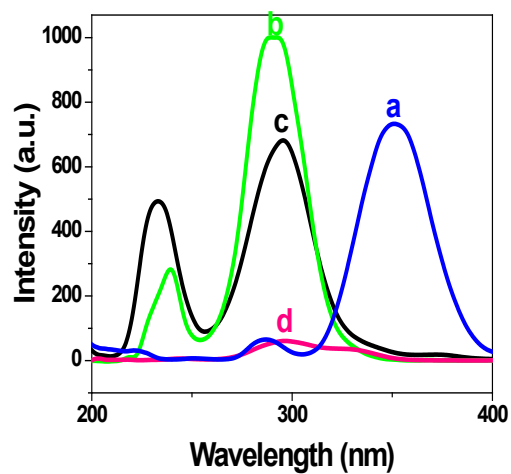

Figure S6: Excitation spectra of (a) unexposed CP, (b) CP-Ag(I) after one hour exposure and (c) CP-Cu(II) after 14 hours exposure and (d) CP-Au(III) after 11 hours exposure. Condition: [CP] =  $1.4 \times 10^{-4}$  M, [Ag(I)] =  $4.2 \times 10^{-4}$  M, [Cu(II)] =  $0.70 \times 10^{-4}$  M, [Au(III)] =  $4.2 \times 10^{-4}$  M.

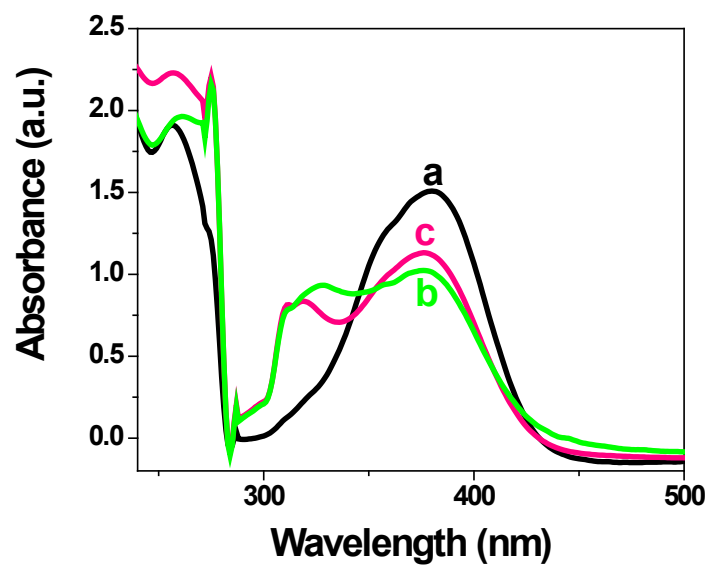

Figure S7: Absorption spectra of (a) unexposed CP, (b) CP-Ag(I) after one hour exposure and (c) CP-Cu(III) after 14 hours exposure.  
Condition: [CP] =  $1.4 \times 10^{-4}$  M, [Ag(I)] =  $4.2 \times 10^{-4}$  M, [Cu(II)] =  $0.70 \times 10^{-4}$  M.



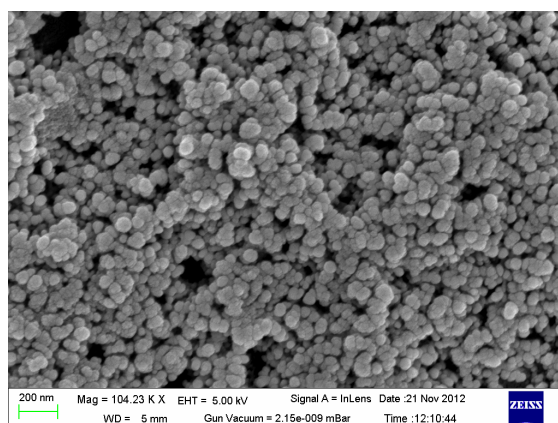

Figure S8: FESEM image of AuNPs obtained as precipitate by adding Ag(I) to the gold hydrosol.  
Condition: [CP] =  $1.4 \times 10^{-4}$  M, [Au(III)] =  $4.2 \times 10^{-4}$  M, [Ag(I)] =  $4.2 \times 10^{-4}$  M.

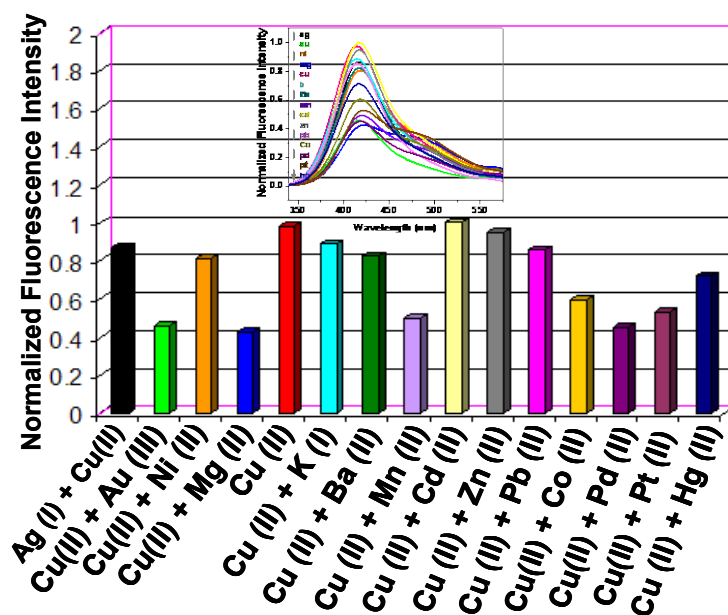

Figure S9: Bar diagram and normalized fluorescence spectra (inset) indicating copper enhanced fluorescence in presence of different interfering metal ions.

Conditions:  $[CP] = 1.4 \times 10^{-5} \text{ M}$ ,  $[Cu(II)] = 0.70 \times 10^{-5} \text{ M}$ ,  $[other M^{n+}] = 0.70 \times 10^{-5} \text{ M}$ ,  $\lambda_{ex} = 290 \text{ nm}$ , exposure time = 14 hours.

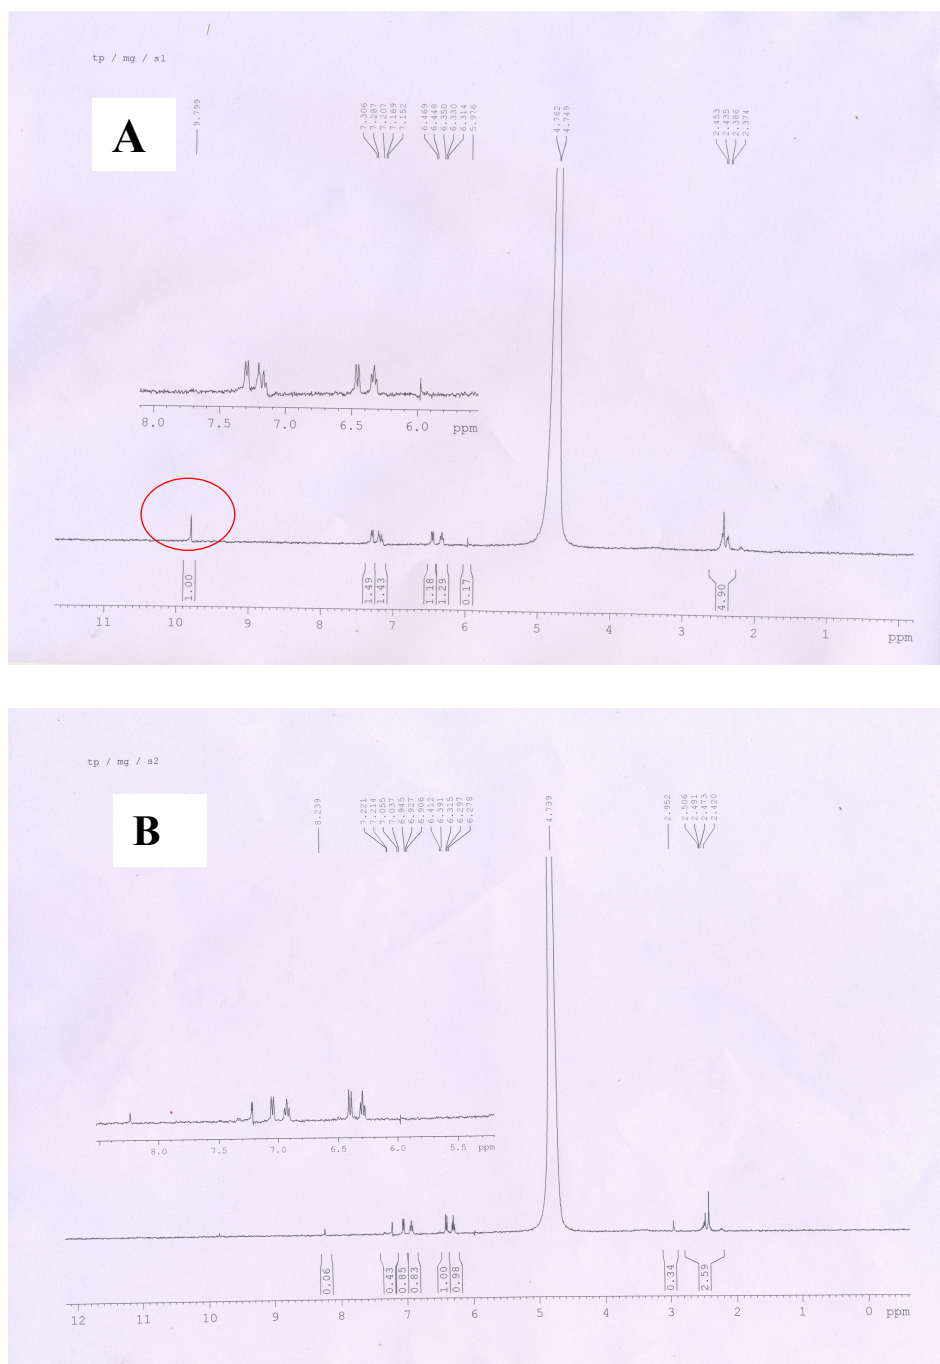

Figure S10:  $^1\text{H}$  NMR of (A) CP and (B) CP-Ag(I) after ~7 hours ageing in alkaline  $\text{D}_2\text{O}$ .

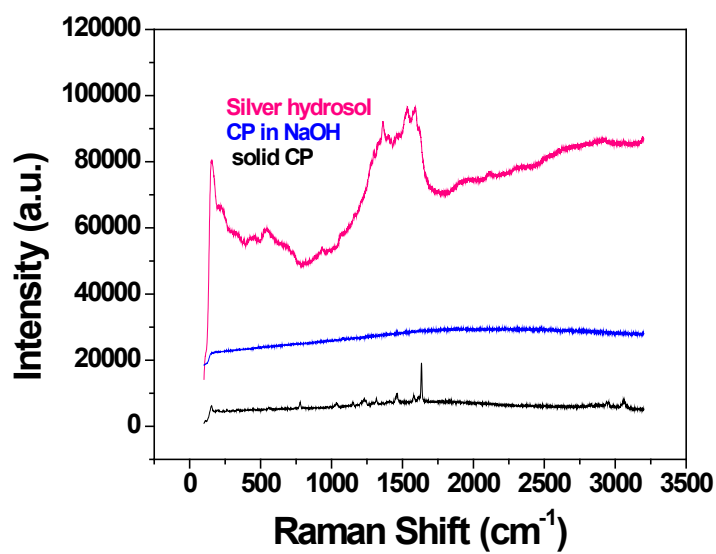

Figure S11: Raman spectra of solid CP, exposed CP in NaOH and exposed CP-Ag(I) in NaOH. Condition: [CP] =  $1.4 \times 10^{-4}$  M, [Au(III)] =  $4.2 \times 10^{-4}$  M, Exposure time = one hour.

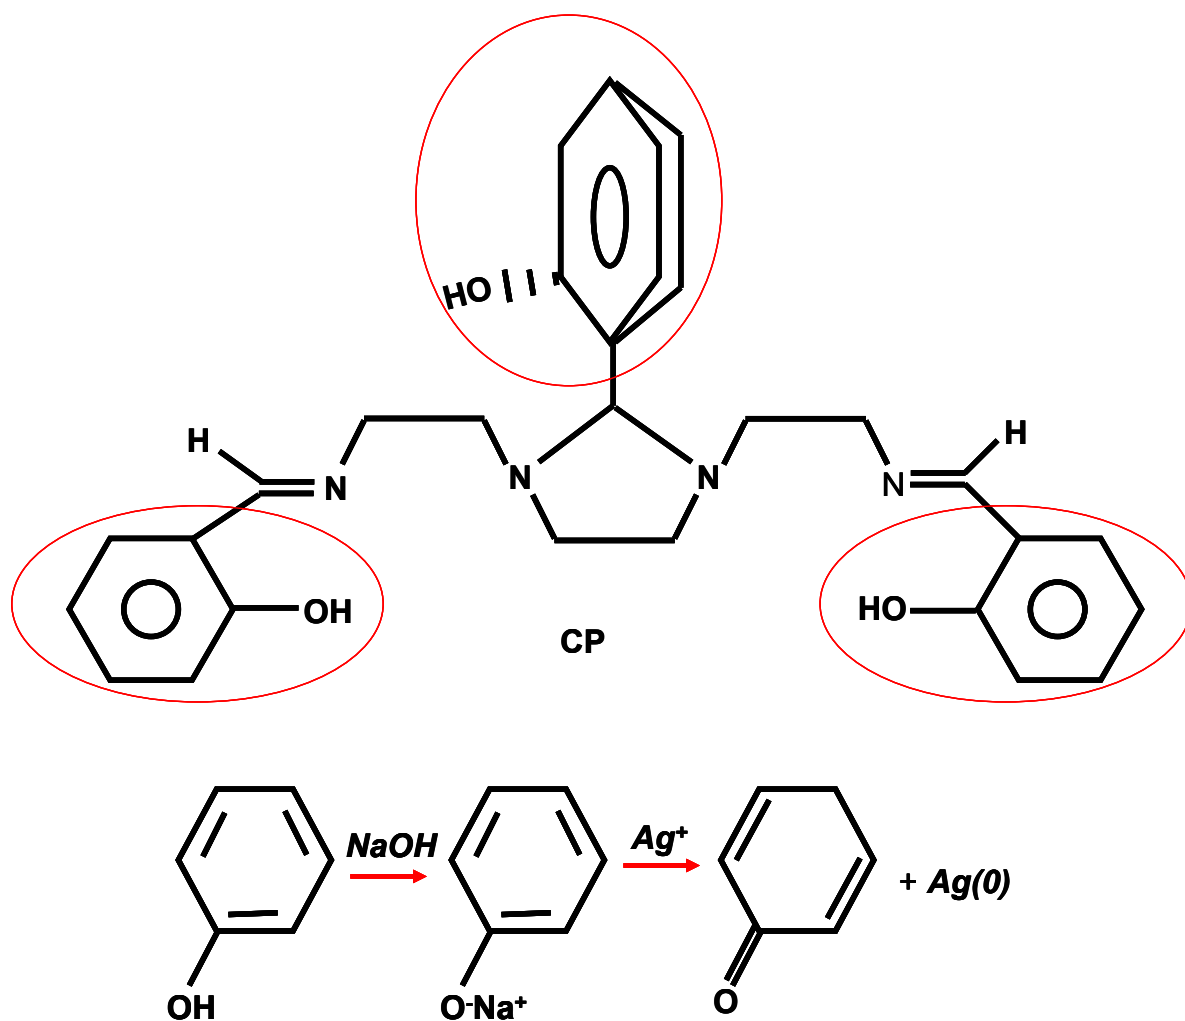

Scheme S1: Mechanism for evolution of coinage metal nanoparticles with the oxidation of CP to its quinone form in aqueous alkaline medium.

Table S1: Elemental analysis for the compound CP.

| Element | Calculated (%) | Experimental (%) |
|---------|----------------|------------------|
| C       | 70.72          | 70.80            |
| N       | 12.22          | 12.11            |
| H       | 06.59          | 06.50            |
